# Supplementary material
Source: publisher figshare collection journal article supplement (https://sage.figshare.com/ndownloader/files/12759812)

## Supplementary Material

**Figure 1.** Heat map of differentially expressed mRNAs in RAW264.7 infected with Omp25 mutant *Brucella melitensis*. Red denotes induction and green denotes suppression.

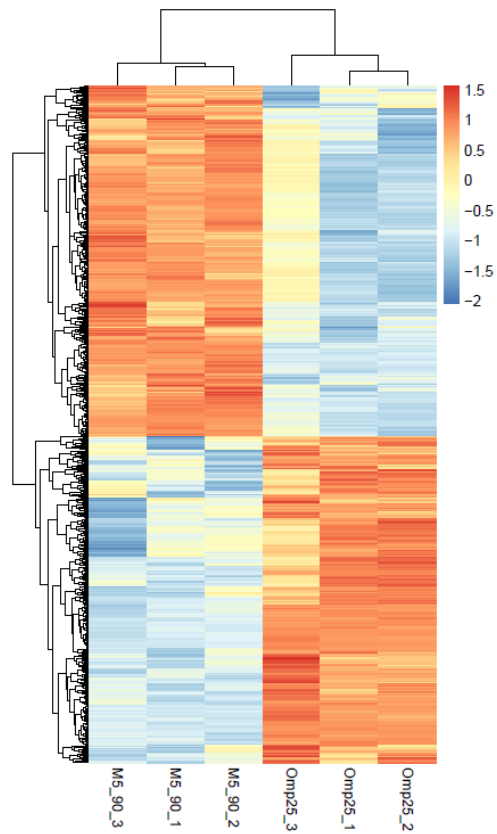

Supplement: Supplementary file 1 [file 12759812]
